# Supplementary material for: Cancer develops, progresses and responds to therapies through restricted perturbation of the protein–protein interaction network
Source: Royal Society of Chemistry journal article supplement (doi:10.1039/c2ib20052j), 2012-01-01

IntAct dataset - Breast cancer - Interactome network failures

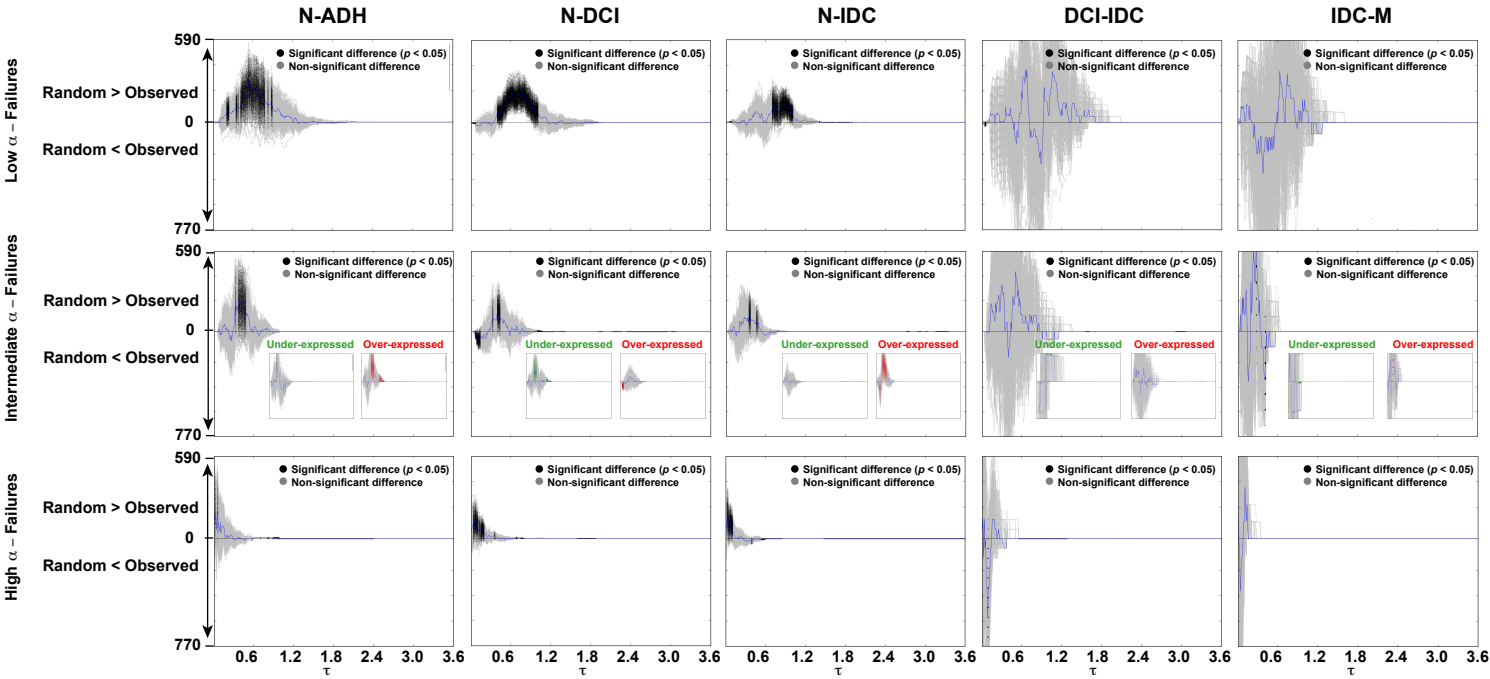

IntAct dataset - Breast cancer - Interactome network failures

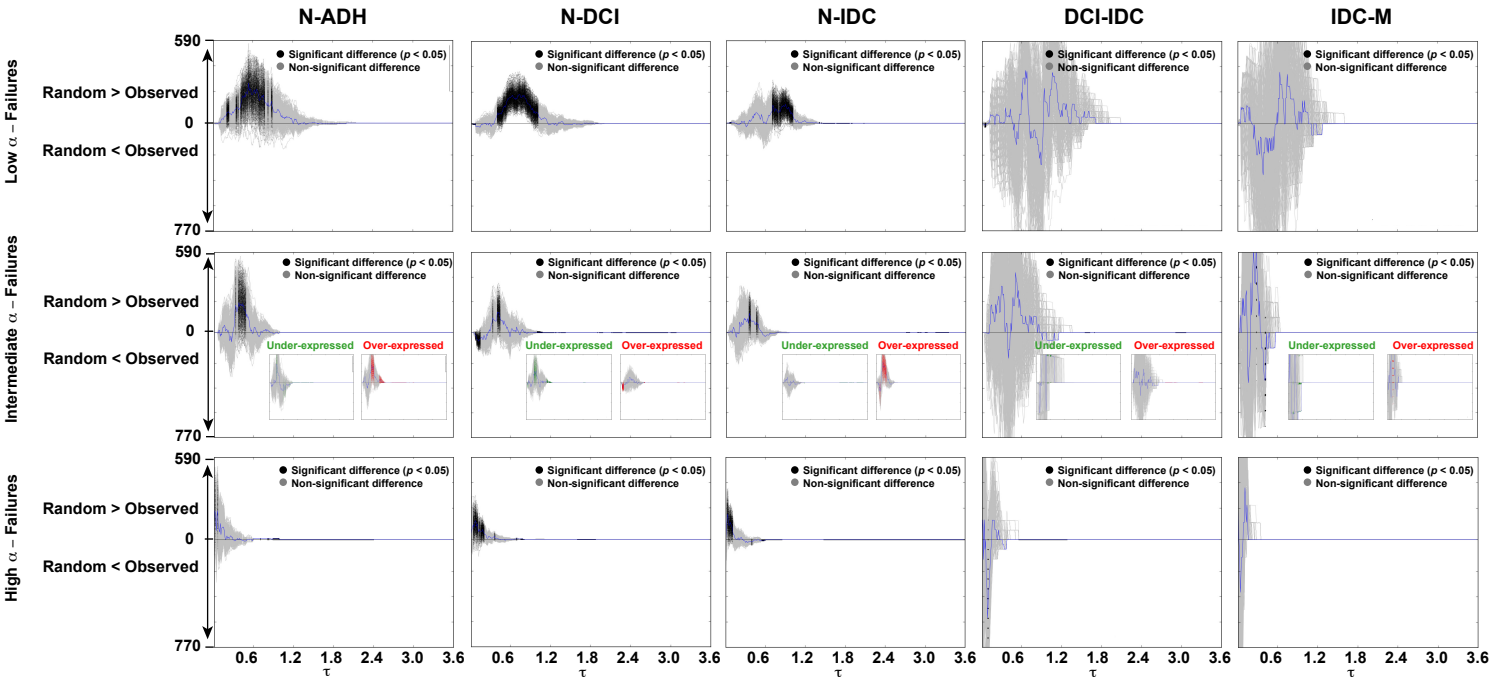

Supplement: c2ib20052j_3.pdf [file c2ib20052j_3.pdf]
