# Supplementary material for: Cancer develops, progresses and responds to therapies through restricted perturbation of the protein–protein interaction network
Source: Royal Society of Chemistry journal article supplement (doi:10.1039/c2ib20052j), 2012-01-01
Supplement: c2ib20052j_7.pdf [file c2ib20052j_7.pdf]

**Table S2** Differentially expressed probes/genes between parental MCF7 and MCF7-SNCA cells

| <b>Probe ID</b>                                  | <b>Gene Symbol*</b> |
|--------------------------------------------------|---------------------|
| 202274_at                                        | ACTG2               |
| 205882_x_at, 201034_at, 201752_s_at, 201753_s_at | ADD3                |
| 231202_at                                        | ALDH1L2             |
| 204446_s_at                                      | ALOX5               |
| 203404_at                                        | ARMCX2              |
| 219973_at                                        | ARSJ                |
| 219667_s_at                                      | BANK1               |
| 203685_at                                        | BCL2                |
| 205548_s_at, 213134_x_at                         | BTG3                |
| 1553630_at                                       | C10orf107           |
| 236840_at                                        | C12orf56            |
| 207259_at                                        | C17orf73            |
| 225685_at                                        | CDC42EP3            |
| 201884_at                                        | CEACAM5             |
| 211657_at, 203757_s_at                           | CEACAM6             |
| 215076_s_at, 201852_x_at, 211161_s_at            | COL3A1              |
| 206212_at                                        | CPA2                |
| 223475_at                                        | CRISPLD1            |
| 218002_s_at, 222484_s_at                         | CXCL14              |
| 1559258_a_at                                     | CXORF61             |
| 228915_at                                        | DACH1               |
| 203881_s_at                                      | DMD                 |
| 206115_at                                        | EGR3                |
| 231174_s_at, 201719_s_at                         | EPB41L2             |
| 233498_at, 214053_at                             | ERBB4               |
| 241926_s_at                                      | ERG                 |
| 207327_at, 238877_at                             | EYA4                |
| 1553906_s_at                                     | FGD2                |
| 204135_at, 1554966_a_at                          | FILIP1L             |
| 218885_s_at                                      | GALNT12             |
| 203178_at                                        | GATM                |
| 201667_at                                        | GJA1                |
| 206002_at                                        | GPR64               |
| 214467_at                                        | GPR65               |
| 202831_at                                        | GPX2                |
| 204418_x_at                                      | GSTM2               |
| 210912_x_at, 204149_s_at                         | GSTM4               |
| 205453_at, 237189_at                             | HOXB2               |
| 228904_at                                        | HOXB3               |
| 203914_x_at, 203913_s_at                         | HPGD                |
| 209292_at                                        | ID4                 |
| 202747_s_at, 202746_at                           | ITM2A               |
| 212192_at                                        | KCTD12              |
| 205470_s_at                                      | KLK11               |
| 213240_s_at                                      | KRT4                |
| 1568879_a_at                                     | LAMA3               |
| 212531_at                                        | LCN2                |
| 208885_at                                        | LCP1                |
| 215306_at                                        | LHCGR               |
| 1569006_at                                       | LOC284379           |
| 244359_s_at, 244114_x_at, 244532_x_at            | LOC401131           |
| 242931_at                                        | LONRF3              |
| 204813_at                                        | MAPK10              |
| 225897_at, 201669_s_at                           | MARCKS              |
| 1556015_a_at                                     | MESP2               |
| 207012_at, 223614_at                             | MMP16               |
| 207430_s_at, 210297_s_at                         | MSMB                |
| 213432_at                                        | MUC5B               |
| 1553602_at                                       | MUCL1               |
| 213375_s_at                                      | N4BP2L1             |
| 206561_s_at                                      | NA                  |
| 202345_s_at                                      | NA                  |
| 1558438_a_at                                     | NA                  |
| 213413_at                                        | NA                  |
| 1557286_at                                       | NA                  |
| 229242_at                                        | NA                  |
| 236335_at                                        | NA                  |
| 236576_at                                        | NA                  |
| 237034_at                                        | NA                  |
| 237365_at                                        | NA                  |
| 238378_at                                        | NA                  |
| 238379_x_at                                      | NA                  |
| 240173_at                                        | NA                  |
| 241535_at                                        | NA                  |
| 1553226_at                                       | NCRNA00052          |
| 208343_s_at, 210174_at                           | NR5A2               |
| 221796_at                                        | NTRK2               |
| 228635_at                                        | PCDH10              |
| 205380_at, 243168_at                             | PDZK1               |
| 212092_at                                        | PEG10               |
| 219014_at                                        | PLAC8               |
| 201215_at                                        | PLS3                |
| 214858_at                                        | PP14571             |
| 233002_at                                        | PPP4R4              |
| 209594_x_at                                      | PSG9                |
| 229823_at                                        | RIMS2               |
| 205916_at                                        | S100A7              |
| 1552365_at                                       | SCIN                |
| 228407_at                                        | SCUBE3              |
| 207302_at                                        | SGCG                |
| 236263_at                                        | SHH                 |
| 201692_at, 214484_s_at                           | SIGMAR1             |
| 205856_at, 229151_at                             | SLC14A1             |
| 213664_at                                        | SLC1A1              |
| 212811_x_at, 209610_s_at                         | SLC1A4              |
| 219795_at                                        | SLC6A14             |
| 203909_at                                        | SLC9A6              |
| 203021_at                                        | SLPI                |
| 207827_x_at, 211546_x_at                         | SNCA                |
| 204914_s_at, 204915_s_at                         | SOX11               |
| 228038_at                                        | SOX2                |
| 207214_at                                        | SPINK4              |
| 213796_at                                        | SPRR1A              |
| 205064_at                                        | SPRR1B              |
| 218990_s_at                                      | SPRR3               |
| 219686_at                                        | STK32B              |
| 220994_s_at, 230560_at, 226462_at                | STXBP6              |
| 232760_at                                        | TEX15               |
| 209676_at, 210664_s_at, 210665_at, 213258_at     | TFPI                |
| 209277_at                                        | TFPI2               |
| 201042_at                                        | TGM2                |
| 226322_at                                        | TMTC1               |
| 213107_at                                        | TNIK                |
| 214774_x_at, 215108_x_at, 216623_x_at            | TOX3                |
| 224412_s_at                                      | TRPM6               |
| 228956_at                                        | UGT8                |
| 206219_s_at                                      | VAV1                |

\*NA, not applicable
