# Supplementary material for: Cancer develops, progresses and responds to therapies through restricted perturbation of the protein–protein interaction network
Source: Royal Society of Chemistry journal article supplement (doi:10.1039/c2ib20052j), 2012-01-01
Supplement: c2ib20052j_8.pdf [file c2ib20052j_8.pdf]

**Table S3.** Average shortest path values of KEGG pathway sets in the HPRD-based interactome network

| Pathway                                                         | Average shortest path |
|-----------------------------------------------------------------|-----------------------|
| <b>Non-topologically robust</b>                                 |                       |
| KEGG_CIRCADIAN_RHYTHM_MAMMAL                                    | 2.22                  |
| KEGG_NON_HOMOLOGOUS_END_JOINING                                 | 2.28                  |
| KEGG_MISMATCH_REPAIR                                            | 2.60                  |
| KEGG_SNARE_INTERACTIONS_IN_VESICULAR_TRANSPORT                  | 2.69                  |
| KEGG_FC_GAMMA_R_MEDIATED_PHAGOCYTOSIS                           | 2.85                  |
| KEGG_ALDOSTERONE_REGULATED_SODIUM_REABSORPTION                  | 2.88                  |
| KEGG_LONG_TERM_POTENTIATION                                     | 2.91                  |
| KEGG_PATHOGENIC_ESCHERICHIA_COLI_INFECTION                      | 2.93                  |
| KEGG_TOLL_LIKE_RECEPTOR_SIGNALING_PATHWAY                       | 3.01                  |
| KEGG_GNRH_SIGNALING_PATHWAY                                     | 3.01                  |
| KEGG_LONG_TERM_DEPRESSION                                       | 3.03                  |
| KEGG_NOD_LIKE_RECEPTOR_SIGNALING_PATHWAY                        | 3.04                  |
| KEGG_ADIPOCYTOKINE_SIGNALING_PATHWAY                            | 3.06                  |
| KEGG_ECM_RECEPTOR_INTERACTION                                   | 3.08                  |
| KEGG_TYPE_II_DIABETES_MELLITUS                                  | 3.08                  |
| KEGG_LEUKOCYTE_TRANSENDOTHELIAL_MIGRATION                       | 3.08                  |
| KEGG_COMPLEMENT_AND_COAGULATION_CASCADES                        | 3.11                  |
| KEGG_AMYOTROPHIC_LATERAL_SCLEROSIS_ALS                          | 3.13                  |
| KEGG_EPITHELIAL_CELL_SIGNALING_IN_HELICOBACTER_PYLORI_INFECTION | 3.23                  |
| KEGG_TIGHT_JUNCTION                                             | 3.27                  |
| KEGG_MATURITY_ONSET_DIABETES_OF_THE_YOUNG                       | 3.28                  |
| KEGG_ARRHYTHMOGENIC_RIGHT_VENTRICULAR_CARDIOMYOPATHY_ARVC       | 3.29                  |
| KEGG_HOMOLOGOUS_RECOMBINATION                                   | 3.30                  |
| KEGG_ENDOCYTOSIS                                                | 3.34                  |
| KEGG_PRIMARY_IMMUNODEFICIENCY                                   | 3.36                  |
| KEGG_CHEMOKINE_SIGNALING_PATHWAY                                | 3.36                  |
| KEGG_NATURAL_KILLER_CELL_MEDIATED_CYTOTOXICITY                  | 3.37                  |
| KEGG_PRION_DISEASES                                             | 3.39                  |
| KEGG_TASTE_TRANSDUCTION                                         | 3.41                  |
| KEGG_LEISHMANIA_INFECTION                                       | 3.42                  |
| KEGG_VASCULAR_SMOOTH_MUSCLE_CONTRACTION                         | 3.43                  |
| KEGG_DILATED_CARDIOMYOPATHY                                     | 3.47                  |
| KEGG_DORSO_VENTRAL_AXIS_FORMATION                               | 3.47                  |
| KEGG_MELANOGENESIS                                              | 3.49                  |
| KEGG_HEMATOPOIETIC_CELL_LINEAGE                                 | 3.55                  |
| KEGG_RNA_POLYMERASE                                             | 3.55                  |
| KEGG_RENIN_ANGIOTENSIN_SYSTEM                                   | 3.57                  |
| KEGG_HYPERTROPHIC_CARDIOMYOPATHY_HCM                            | 3.59                  |
| KEGG_CALCIIUM_SIGNALING_PATHWAY                                 | 3.60                  |
| KEGG_OLFACTORY_TRANSDUCTION                                     | 3.60                  |
| KEGG_ALZHEIMERS_DISEASE                                         | 3.60                  |
| KEGG_CELL_ADHESION_MOLECULES_CAMS                               | 3.65                  |
| KEGG_VASOPRESSIN_REGULATED_WATER_REABSORPTION                   | 3.70                  |
| KEGG_REGULATION_OF_AUTOPHAGY                                    | 3.76                  |
| KEGG_HUNTINGTONS_DISEASE                                        | 3.76                  |
| KEGG_CYTOSOLIC_DNA_SENSING_PATHWAY                              | 3.80                  |
| KEGG_ANTIGEN_PROCESSING_AND_PRESENTATION                        | 3.83                  |
| KEGG_VIRAL_MYOCARDITIS                                          | 3.86                  |
| KEGG_GRAFT_VERSUS_HOST_DISEASE                                  | 3.86                  |
| KEGG_ALLOGRAFT_REJECTION                                        | 3.92                  |
| KEGG_ETHER_LIPID_METABOLISM                                     | 3.92                  |
| KEGG_TYPE_I_DIABETES_MELLITUS                                   | 3.93                  |
| KEGG_AUTOIMMUNE_THYROID_DISEASE                                 | 3.98                  |
| KEGG_CYTOKINE_CYTOKINE_RECEPTOR_INTERACTION                     | 4.00                  |
| KEGG_VIBRIO_CHOLERAЕ_INFECTION                                  | 4.02                  |
| KEGG_AMINOACYL_TRNA_BIOSYNTHESIS                                | 4.04                  |
| KEGG_GLYCOSYLPHOSPHATIDYLINOSITOL_GPI_ANCHOR_BIOSYNTHESIS       | 4.05                  |
| KEGG_PPAR_SIGNALING_PATHWAY                                     | 4.06                  |
| KEGG_GLYCOLYSIS_GLUconeogenesis                                 | 4.08                  |
| KEGG_FRUCTOSE_AND_MANNose_METABOLISM                            | 4.08                  |
| KEGG_ASTHMA                                                     | 4.10                  |
| KEGG_PARKINSONS_DISEASE                                         | 4.12                  |
| KEGG_CYSTEINE_AND_METHIONINE_METABOLISM                         | 4.16                  |
| KEGG_PENTOSE_PHOSPHATE_PATHWAY                                  | 4.17                  |
| KEGG_ALANINE ASPARTATE AND GLUTAMATE METABOLISM                 | 4.20                  |
| KEGG_INTESTINAL_IMMUNE_NETWORK_FOR_IGA_PRODUCTION               | 4.21                  |
| KEGG_GALACTOSE_METABOLISM                                       | 4.23                  |
| KEGG_NEUROACTIVE_LIGAND_RECEPTOR_INTERACTION                    | 4.24                  |
| KEGG_HEDGEHOG_SIGNALING_PATHWAY                                 | 4.25                  |
| KEGG_PORPHYRIN_AND_CHLOROPHYLL_METABOLISM                       | 4.26                  |

|                                                   |      |
|---------------------------------------------------|------|
| KEGG_PROXIMAL_TUBULE_BICARBONATE_RECLAMATION      | 4.28 |
| KEGG_GLYCEROLIPID_METABOLISM                      | 4.29 |
| KEGG_LYSOSOME                                     | 4.30 |
| KEGG_PURINE_METABOLISM                            | 4.31 |
| KEGG_CARDIAC_MUSCLE_CONTRACTION                   | 4.32 |
| KEGG_GLYCEROPHOSPHOLIPID_METABOLISM               | 4.33 |
| KEGG_ARGININE_AND_PROLINE_METABOLISM              | 4.36 |
| KEGG_LYSINE_DEGRADATION                           | 4.36 |
| KEGG_SYSTEMIC_LUPUS_ERYTHEMATOSUS                 | 4.37 |
| KEGG_NITROGEN_METABOLISM                          | 4.40 |
| KEGG_RIBOSOME                                     | 4.40 |
| KEGG_DRUG_METABOLISM_OTHER_ENZYMES                | 4.42 |
| KEGG_ABC_TRANSPORTERS                             | 4.51 |
| KEGG_FATTY_ACID_METABOLISM                        | 4.53 |
| KEGG_SPHINGOLIPID_METABOLISM                      | 4.55 |
| KEGG_PEROXISOME                                   | 4.57 |
| KEGG_TYROSINE_METABOLISM                          | 4.58 |
| KEGG_PYRUVATE_METABOLISM                          | 4.64 |
| KEGG_VALINE_LEUCINE_AND_ISOLEUCINE_DEGRADATION    | 4.64 |
| KEGG_STARCH_AND_SUCROSE_METABOLISM                | 4.66 |
| KEGG_TRYPTOPHAN_METABOLISM                        | 4.67 |
| KEGG_N_GLYCAN_BIOSYNTHESIS                        | 4.68 |
| KEGG_OXIDATIVE_PHOSPHORYLATION                    | 4.71 |
| KEGG_GLYCINE_SERINE_AND_THREONINE_METABOLISM      | 4.75 |
| KEGG_ARACHIDONIC_ACID_METABOLISM                  | 4.76 |
| KEGG_O_GLYCAN_BIOSYNTHESIS                        | 4.77 |
| KEGG_BUTANOATE_METABOLISM                         | 4.79 |
| KEGG_RIBOFLAVIN_METABOLISM                        | 4.79 |
| KEGG_DRUG_METABOLISM_CYTOCHROME_P450              | 4.79 |
| KEGG_GLUTATHIONE_METABOLISM                       | 4.80 |
| KEGG_CITRATE_CYCLE_TCA_CYCLE                      | 4.81 |
| KEGG_METABOLISM_OF_XENOBIOTICS_BY_CYTOCHROME_P450 | 4.83 |
| KEGG_AMINO_SUGAR_AND_NUCLEOTIDE_SUGAR_METABOLISM  | 4.85 |
| KEGG_PROPANOATE_METABOLISM                        | 4.92 |
| KEGG_PROTEIN_EXPORT                               | 5.10 |
| KEGG_OTHER_GLYCAN_DEGRADATION                     | 5.11 |

**Topologically robust**

|                                              |      |
|----------------------------------------------|------|
| KEGG_BASAL_TRANSCRIPTION_FACTORS             | 2.40 |
| KEGG_NOTCH_SIGNALING_PATHWAY                 | 2.45 |
| KEGG_ERBB_SIGNALING_PATHWAY                  | 2.46 |
| KEGG_ADHERENS_JUNCTION                       | 2.51 |
| KEGG_NEUROTROPHIN_SIGNALING_PATHWAY          | 2.58 |
| KEGG_CELL_CYCLE                              | 2.67 |
| KEGG_B_CELL_RECEPTOR_SIGNALING_PATHWAY       | 2.70 |
| KEGG_DNA_REPLICATION                         | 2.72 |
| KEGG_FC_EPSILON_R1_SIGNALING_PATHWAY         | 2.74 |
| KEGG_T_CELL_RECEPTOR_SIGNALING_PATHWAY       | 2.80 |
| KEGG_APOPTOSIS                               | 2.83 |
| KEGG_P53_SIGNALING_PATHWAY                   | 2.86 |
| KEGG_BASE_EXCISION_REPAIR                    | 2.91 |
| KEGG_NUCLEOTIDE_EXCISION_REPAIR              | 2.92 |
| KEGG_VEGF_SIGNALING_PATHWAY                  | 2.93 |
| KEGG_PROGESTERONE_MEDIATED_OOCYTE_MATURATION | 3.00 |
| KEGG_FOCAL_ADHESION                          | 3.01 |
| KEGG_TGF_BETA_SIGNALING_PATHWAY              | 3.03 |
| KEGG_GAP_JUNCTION                            | 3.04 |
| KEGG_INSULIN_SIGNALING_PATHWAY               | 3.09 |
| KEGG_MTOR_SIGNALING_PATHWAY                  | 3.09 |
| KEGG_MAPK_SIGNALING_PATHWAY                  | 3.11 |
| KEGG_OOCYTE_MEIOSIS                          | 3.19 |
| KEGG_REGULATION_OF_ACTIN_CYTOSKELETON        | 3.23 |
| KEGG_JAK_STAT_SIGNALING_PATHWAY              | 3.24 |
| KEGG_RIG_I_LIKE_RECEPTOR_SIGNALING_PATHWAY   | 3.26 |
| KEGG_WNT_SIGNALING_PATHWAY                   | 3.34 |
| KEGG_UBIQUITIN_MEDIATED_PROTEOLYSIS          | 3.40 |
| KEGG_PROTEASOME                              | 3.42 |
| KEGG_RNA_DEGRADATION                         | 3.42 |
| KEGG_PHOSPHATIDYLINOSITOL_SIGNALING_SYSTEM   | 3.50 |
| KEGG_SPLICEOSOME                             | 3.52 |
| KEGG_AXON_GUIDANCE                           | 3.57 |
| KEGG_INOSITOL_PHOSPHATE_METABOLISM           | 3.79 |
| KEGG_PYRIMIDINE_METABOLISM                   | 4.03 |

---
