# Supplementary figures and images for: Cancer develops, progresses and responds to therapies through restricted perturbation of the protein–protein interaction network
Source: Royal Society of Chemistry journal article supplement (doi:10.1039/c2ib20052j), 2012-01-01

### Interactome network failures

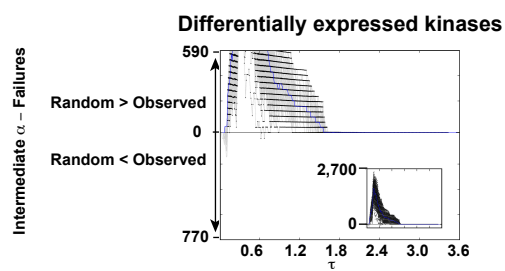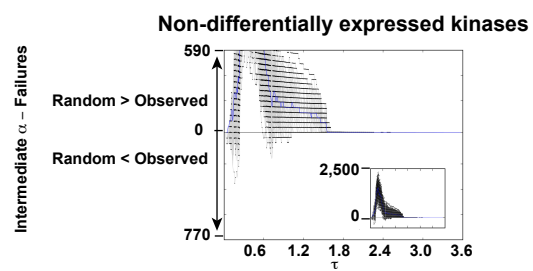

### Interactome network failures

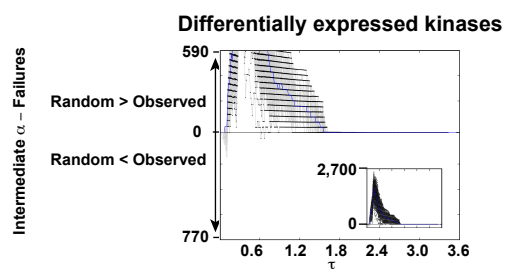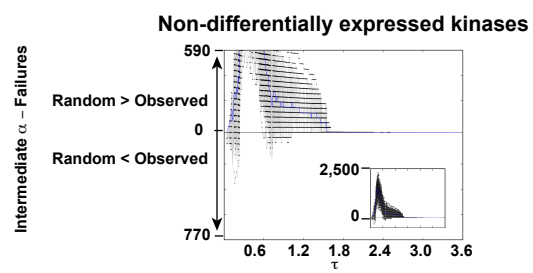

Supplement: c2ib20052j_5.pdf [file c2ib20052j_5.pdf]

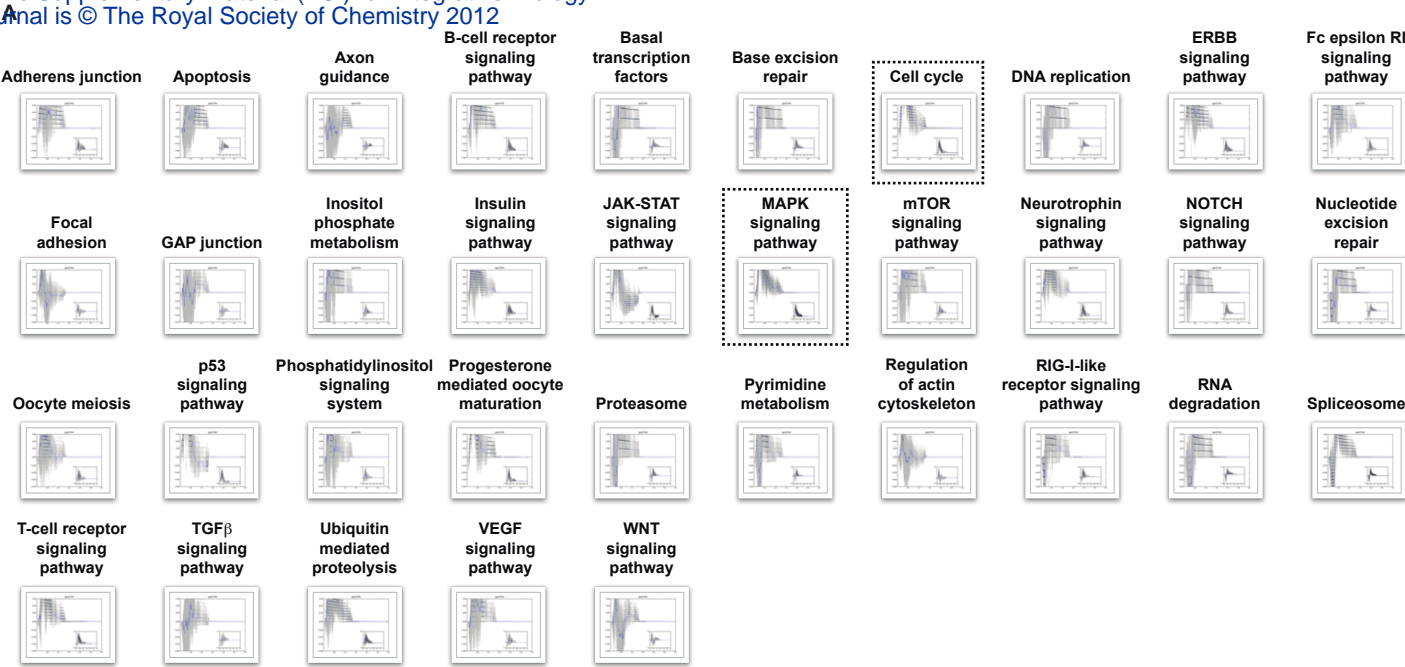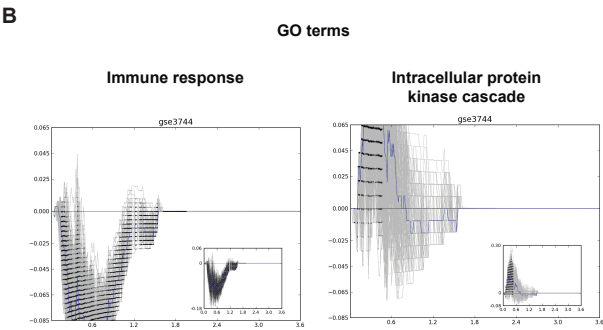

Supplement: c2ib20052j_9.pdf [file c2ib20052j_9.pdf]
